# Supplementary material
Source: publisher figshare collection journal article supplement (https://acs.figshare.com/ndownloader/files/16188566)
Supplement: Supplementary file 1 [file 16188566]

## Supporting Information

# **Ultra-sensitive sniff-cam for biofluorometric-imaging of breath ethanol caused by metabolism of intestinal flora**

Kenta Iitani<sup>a,b,c</sup>, Koji Toma<sup>d</sup>, Takahiro Arakawa<sup>d</sup>, and Kohji Mitsubayashi<sup>c,d,\*</sup>

*<sup>a</sup> Postdoctoral Research Fellow PD, Japan Society for the Promotion of Science, 5-3-1*

*Kojimatchi, Chiyoda-ku, Tokyo 102-0083, Japan*

*<sup>b</sup> Department of Life Science and Medical Bioscience, Graduate School of Advanced Science and Engineering, Waseda University (TWIns), 2-2 Wakamatsu-cho, Shinjuku-ku, Tokyo 162-8480, Japan*

*<sup>c</sup> Graduate School of Medical and Dental Sciences, Tokyo Medical and Dental University, 1-5-45 Yushima, Bunkyo-ku, Tokyo 113-8510, Japan*

*<sup>d</sup> Department of Biomedical Devices and Instrumentation, Institute of Biomaterials and Bioengineering, Tokyo Medical and Dental University, 2-3-10 Kanda-Surugadai, Chiyoda-ku, Tokyo 101-0062, Japan*

\*corresponding author

Email: m.bdi@tmd.ac.jp

## Table of contents:

|                                                                                                       |      |
|-------------------------------------------------------------------------------------------------------|------|
| Figure S-1 Time course of the mean intensity of ROI with various image analysis method.....           | S-3  |
| Figure S-2 Comparison of background noise and SN ratio between 5 different image analysis method..... | S-4  |
| Figure S-3 Relationship between 90% response time and NAD <sup>+</sup> concentration .....            | S-5  |
| Table S-1 Preparation condition of NAD <sup>+</sup> /NADH mixture solution.....                       | S-6  |
| Figure S-4 fluorescence and absorbance spectrum of NAD <sup>+</sup> /NADH mixture solutions.....      | S-7  |
| Figure S-5 Calibration curves under different concentration of NAD <sup>+</sup> solution .....        | S-8  |
| Figure S-6 Typical responses of the differential value with human breath .....                        | S-9  |
| Table S-2 Comparison of previously developed Sniff-cam and newly developed one.....                   | S-10 |
| References.....                                                                                       | S-11 |

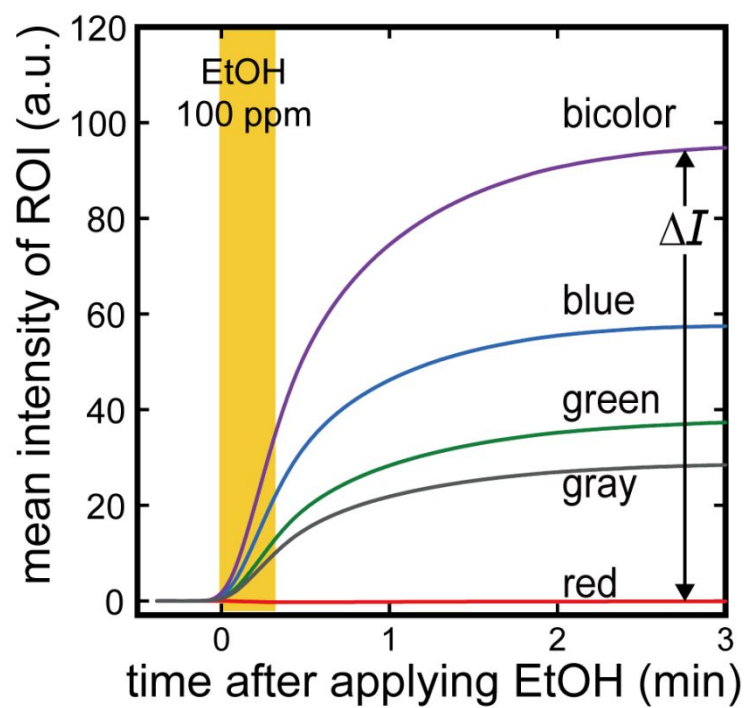

**Figure S-1.** Time course of the mean intensity of ROI with various image analysis method.  $\Delta I$  was calculated by averaging a mean intensity of ROI at 180 to 180 s after applying EtOH.

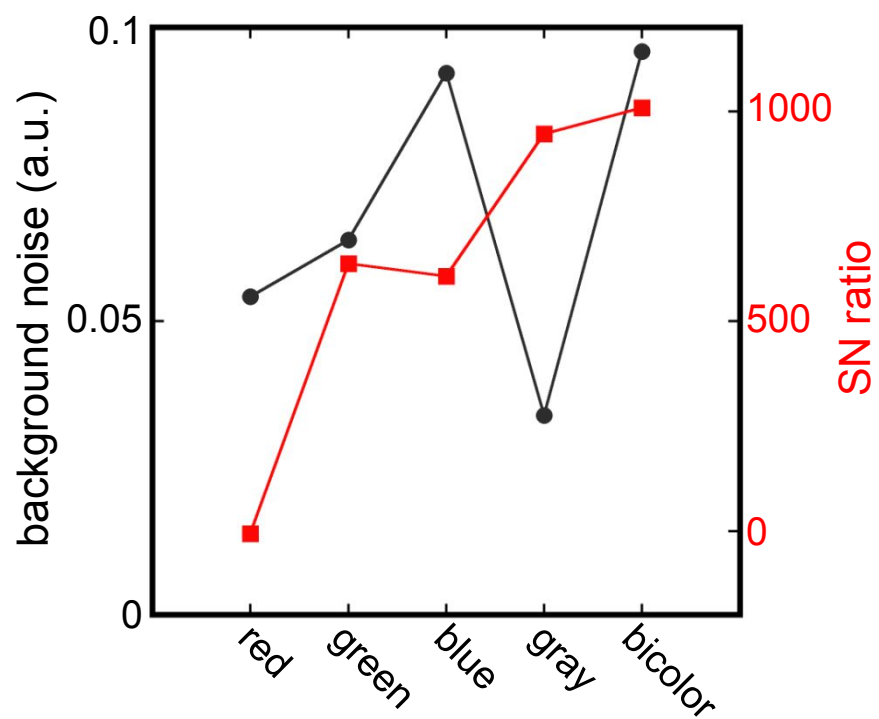

**Figure S-2.** Comparison of background noise and SN ratio between 5 different image analysis method.

**Table S-1.** Preparation condition of NAD<sup>+</sup>/NADH mixture solution

| Molar ratio | NAD <sup>+</sup> (mM) | NADH (mM) |
|-------------|-----------------------|-----------|
| Control     | 0                     | 0.1       |
| 1:1         | 0.1                   | 0.1       |
| 10:1        | 1                     | 0.1       |
| 100:1       | 10                    | 0.1       |
| 1000:1      | 100                   | 0.1       |

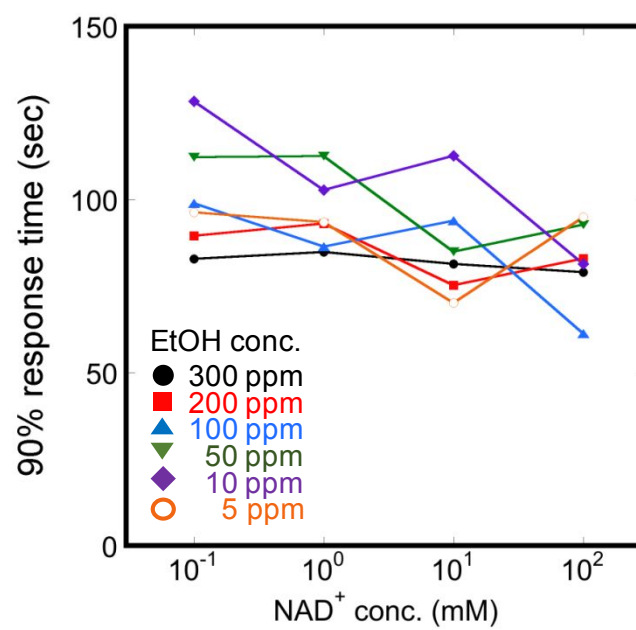

**Figure S-3.** The relationship between 90% response time and initial NAD<sup>+</sup> concentration.

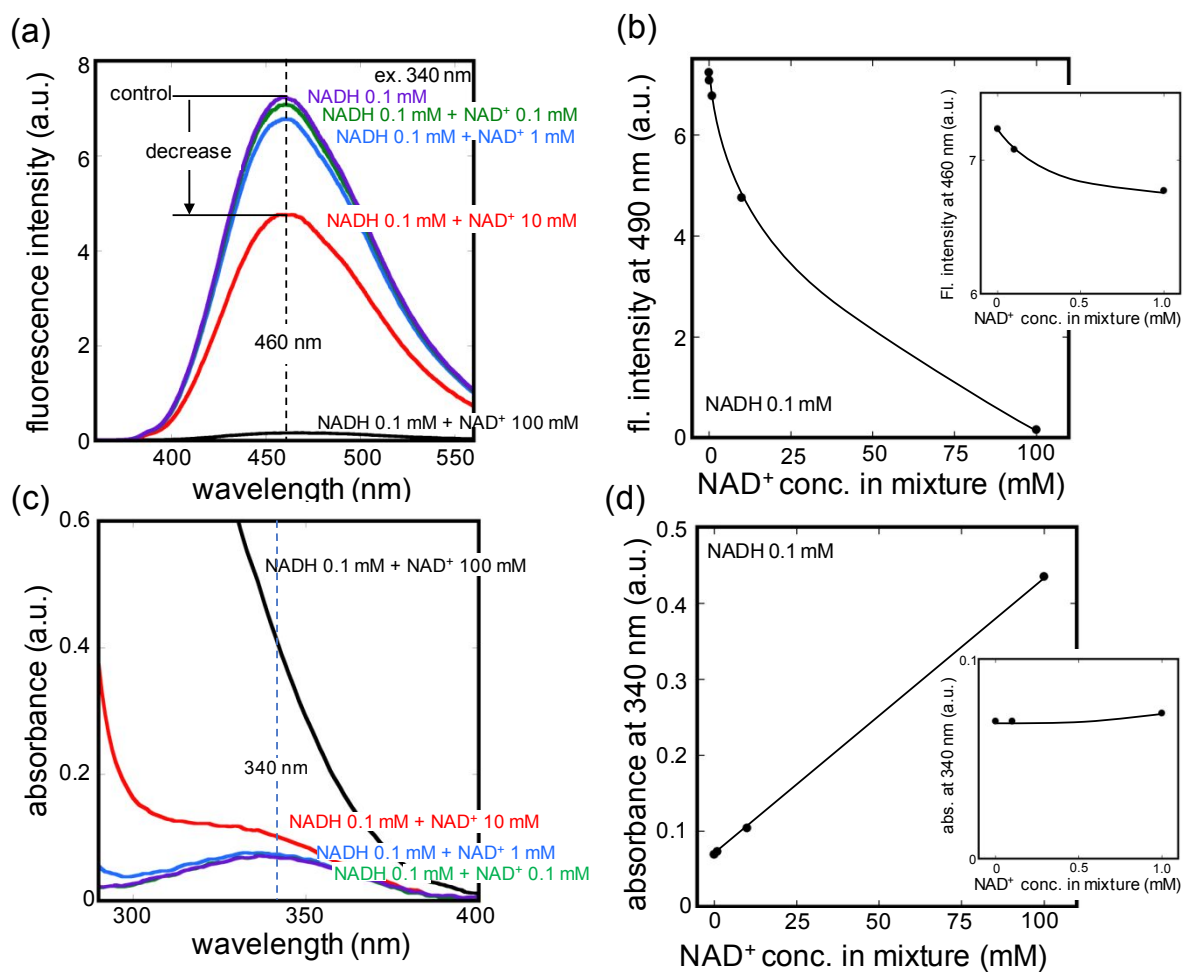

**Figure S-4.** (a) Fluorescence spectrum of NAD<sup>+</sup>/NADH mixture solutions that were excited by 340 nm of UV light. These samples were prepared as shown in table S-1. (b) Relationship between  $\Delta I_{fl}$  and NAD<sup>+</sup> concentration in NAD<sup>+</sup>/NADH mixture solution. (c) The absorbance spectrum of the same sample to (a) and (b). (d) The relationship between absorbance at 340 nm and NAD<sup>+</sup> concentration in NAD<sup>+</sup>/NADH mixture solution.

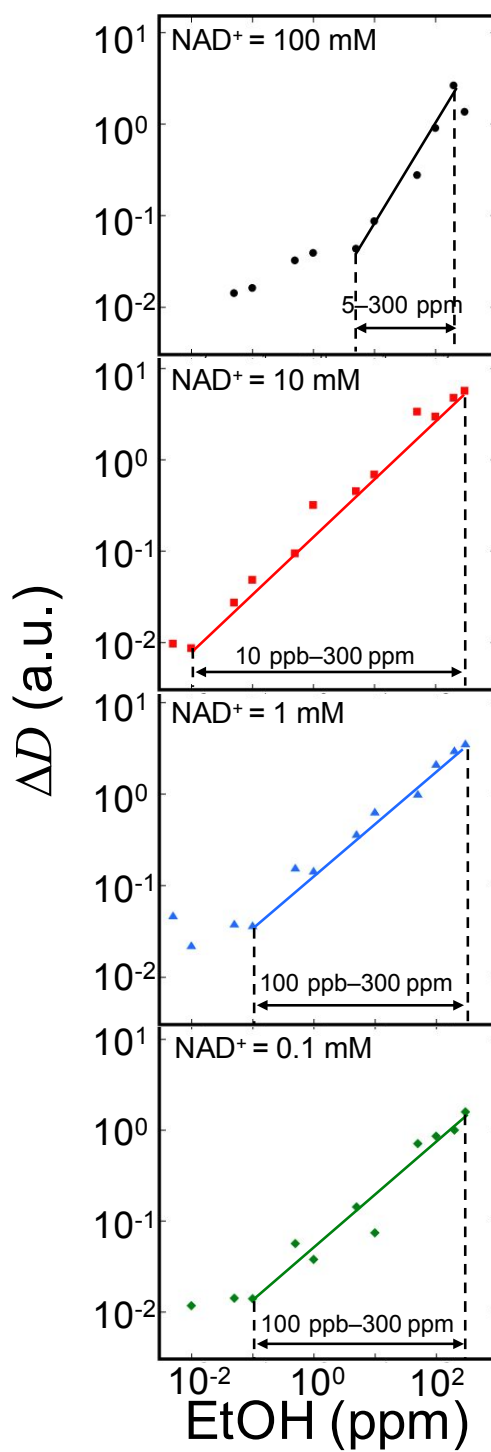

**Figure S-5.** Calibration curves of EtOH that were obtained by using a different concentration of  $\text{NAD}^+$  solutions. Dynamic range was changed depending on the concentration of the  $\text{NAD}^+$  solution.



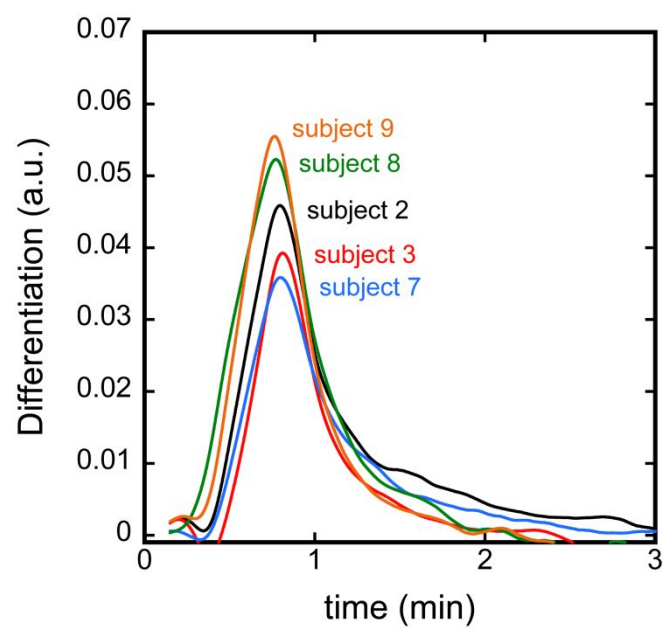

**Figure S-6.** Typical responses of the differential value in to breath EtOH in the absence of alcohol consumption.

**Table S-2.** Comparison of previously developed Sniff-cam and newly developed one

|                         | dynamic range<br>(ppm)                | EtOH dose<br>(g/kg bw) | peak max conc. in breath                                                                                                             | ref. |
|-------------------------|---------------------------------------|------------------------|--------------------------------------------------------------------------------------------------------------------------------------|------|
| EtOH<br>sniff-cam       | 1-150                                 | 0.4                    | 127.7 ppm (EtOH, ALDH2[+])<br>143.6 ppm (EtOH, ALDH2[-])                                                                             | 1    |
| AcH<br>sniff-cam        | 0.1-10                                | 0.4                    | 2.75 ± 0.38 ppm (AcH, ALDH2[+])<br>8.64 ± 0.32 ppm (AcH, ALDH2[-])                                                                   | 2    |
| switchable<br>sniff-cam | 0.1-1000<br>(EtOH)<br>0.2-10<br>(AcH) | 0.4                    | 145.3 ± 13.5 ppm (EtOH, ALDH2[+])<br>1.7 ± 0.2 ppm (AcH, ALDH2[+])<br>163.28.0 ppm (EtOH, ALDH2[-])<br>8.4 ± 0.5 ppm (AcH, ALDH2[-]) | 3    |
| This study              | 0.02-300                              | 0<br>(without)         | 116.2 ± 35.7 ppb                                                                                                                     |      |

bw; body weight

## References

- (1) Arakawa, T.; Sato, T.; Iitani, K.; Toma, K.; Mitsubayashi, K. Fluorometric Biosniffer Camera “Sniff-Cam” for Direct Imaging of Gaseous Ethanol in Breath and Transdermal Vapor. *Anal. Chem.* **2017**, *89* (8), 4495–4501. <https://doi.org/10.1021/acs.analchem.6b04676>.
- (2) Iitani, K.; Sato, T.; Naisierding, M.; Hayakawa, Y.; Toma, K.; Arakawa, T.; Mitsubayashi, K. Fluorometric Sniff-Cam (Gas-Imaging System) Utilizing Alcohol Dehydrogenase for Imaging Concentration Distribution of Acetaldehyde in Breath and Transdermal Vapor after Drinking. *Anal. Chem.* **2018**, *90* (4), 2678–2685. <https://doi.org/10.1021/acs.analchem.7b04474>.
- (3) Iitani, K.; Hayakawa, Y.; Toma, K.; Arakawa, T.; Mitsubayashi, K. Switchable Sniff-Cam (Gas-Imaging System) Based on Redox Reactions of Alcohol Dehydrogenase for Ethanol and Acetaldehyde in Exhaled Breath. *Talanta* **2019**, *197* (December 2018), 249–256. <https://doi.org/10.1016/j.talanta.2018.12.070>.
